# Supplementary material for: The Interplay of NEAT1 and miR-339-5p Influences on Mesangial Gene Expression and Function in Various Diabetic-Associated Injury Models
Source: MDPI journal article supplement (doi:10.3390/ncrna8040052), 2022-07-13
Supplement: s1 [file s1]

Supplementary Table S1:

Differentially expressed coding genes after 24 h of silencing NEAT1

| Gene       | x-fold change | FDR p value | Description                                                                                                  |
|------------|---------------|-------------|--------------------------------------------------------------------------------------------------------------|
| EDN1       | -11.13        | 0.0006      | Endothelin 1                                                                                                 |
| CTGF       | -5.87         | 0.0001      | Connective tissue growth factor                                                                              |
| ACTC1      | -5.81         | 0.0147      | Actin, alpha, cardiac muscle 1                                                                               |
| RGS4       | -4.77         | 0.0149      | Regulator of g-protein signaling 4                                                                           |
| INHBA      | -4.53         | 0.0001      | Inhibin beta a                                                                                               |
| THBS1      | -4.22         | 0.0415      | Thrombospondin 1                                                                                             |
| ADIPOR1    | -3.8          | 0.0055      | Adiponectin receptor 1                                                                                       |
| GNPNAT1    | -3.67         | 0.0077      | Glucosamine-phosphate n-acetyltransferase 1                                                                  |
| SKP2       | -3.55         | 0.0006      | S-phase kinase-associated protein 2, e3 ubiquitin protein ligase                                             |
| TRPC4      | -3.5          | 0.0212      | Transient receptor potential cation channel, subfamily c, member 4                                           |
| MYOCD      | -3.29         | 0.0187      | Myocardin                                                                                                    |
| DDAH1      | -3.17         | 0.0385      | Dimethylarginine dimethylaminohydrolase 1                                                                    |
| VGLL3      | -3.09         | 0.0208      | Vestigial-like family member 3                                                                               |
| LPCAT2     | -3.04         | 0.01        | Lysophosphatidylcholine acyltransferase 2                                                                    |
| GREM1      | -3.04         | 0.0208      | Gremlin 1, dan family bmp antagonist [source:hgnc symbol]                                                    |
| SH3BGRL2   | -3.02         | 0.0147      | Sh3 domain binding glutamate-rich protein like 2                                                             |
| ENTPD7     | -2.97         | 0.0208      | Ectonucleoside triphosphate diphosphohydrolase 7                                                             |
| TGFB2      | -2.97         | 0.0147      | Transforming growth factor beta 2                                                                            |
| LBH        | -2.95         | 0.0087      | Limb bud and heart development                                                                               |
| VAT1L      | -2.94         | 0.0208      | Vesicle amine transport 1-like                                                                               |
| ARID5B     | -2.86         | 0.0147      | At rich interactive domain 5b (mrf1-like)                                                                    |
| SGK1       | -2.86         | 0.0208      | Serum/glucocorticoid regulated kinase 1                                                                      |
| NECAP1     | -2.78         | 0.01        | Necap endocytosis associated 1                                                                               |
| CCND1      | -2.76         | 0.0258      | Cyclin d1                                                                                                    |
| GTF2E1     | -2.7          | 0.009       | General transcription factor iie subunit 1                                                                   |
| PDE1C      | -2.64         | 0.0147      | Phosphodiesterase 1c, calmodulin-dependent 70kda                                                             |
| ADM        | -2.61         | 0.0335      | Adrenomedullin                                                                                               |
| ST6GALNAC5 | -2.6          | 0.0188      | St6 (alpha-n-acetyl-neuraminy-2,3-beta-galactosyl-1,3)-n-acetylgalactosaminide alpha-2,6-sialyltransferase 5 |
| CDK6       | -2.57         | 0.009       | Cyclin-dependent kinase 6                                                                                    |
| TIMP3      | -2.54         | 0.0385      | Timp metalloproteinase inhibitor 3                                                                           |
| NAV3       | -2.53         | 0.0208      | Neuron navigator 3                                                                                           |
| CRIM1      | -2.53         | 0.0198      | Cysteine rich transmembrane bmp regulator 1 (chordin-like)                                                   |
| YTHDF3     | -2.51         | 0.0255      | Yth n(6)-methyladenosine rna binding protein 3                                                               |

|          |       |        |                                                                                       |
|----------|-------|--------|---------------------------------------------------------------------------------------|
| ZNF460   | -2.5  | 0.0149 | Zinc finger protein 460                                                               |
| ADAM19   | -2.49 | 0.0147 | Adam metallopeptidase domain 19                                                       |
| LBR      | -2.45 | 0.0208 | Lamin b receptor                                                                      |
| TROVE2   | -2.45 | 0.0208 | Trove domain family, member 2                                                         |
| GSTCD    | -2.42 | 0.0055 | Glutathione s-transferase, c-terminal domain containing                               |
| GSKIP    | -2.40 | 0.0208 | Gsk3b interacting protein                                                             |
| AMIGO2   | -2.40 | 0.0314 | Adhesion molecule with ig-like domain 2                                               |
| PAQR3    | -2.35 | 0.0090 | Progestin and adipoq receptor family member iii                                       |
| FAM3C    | -2.34 | 0.0259 | Family with sequence similarity 3, member c                                           |
| ERRFI1   | -2.34 | 0.0210 | ErbB receptor feedback inhibitor 1                                                    |
| STARD7   | -2.33 | 0.0323 | Star-related lipid transfer domain containing 7                                       |
| GOLT1B   | -2.31 | 0.0121 | Golgi transport 1b                                                                    |
| UBASH3B  | -2.25 | 0.0424 | Ubiquitin associated and sh3 domain containing b                                      |
| HN1      | -2.24 | 0.0208 | Hematological and neurological expressed 1                                            |
| IER3     | -2.23 | 0.0209 | Immediate early response 3                                                            |
| ATXN1    | -2.20 | 0.0448 | Ataxin 1                                                                              |
| TACC1    | -2.20 | 0.0323 | Transforming, acidic coiled-coil containing protein 1                                 |
| DUSP5    | -2.16 | 0.0208 | Dual specificity phosphatase 5                                                        |
| SLC20A2  | -2.12 | 0.0147 | Solute carrier family 20 (phosphate transporter), member 2                            |
| CYR61    | -2.09 | 0.0284 | Cysteine-rich, angiogenic inducer, 61                                                 |
| TMEM2    | -2.08 | 0.0208 | Transmembrane protein 2                                                               |
| ENC1     | -2.03 | 0.0288 | Ectodermal-neural cortex 1 (with btb domain)                                          |
| AP2A1    | 2.01  | 0.0147 | Adaptor-related protein complex 2, alpha 1 subunit                                    |
| PBK      | 2.04  | 0.0149 | Pdz binding kinase                                                                    |
| GATS     | 2.05  | 0.0475 | Gats, stromal antigen 3 opposite strand                                               |
| CBFA2T2  | 2.07  | 0.0385 | Core-binding factor, runt domain, alpha subunit 2                                     |
| TSPAN3   | 2.07  | 0.0252 | Tetraspanin 3                                                                         |
| MLST8    | 2.10  | 0.0208 | Mtor associated protein, Ist8 homolog                                                 |
| PDGFA    | 2.17  | 0.0055 | Platelet-derived growth factor alpha polypeptide                                      |
| PKD2     | 2.17  | 0.0208 | Pyruvate dehydrogenase kinase, isozyme 2                                              |
| COA3     | 2.26  | 0.0149 | Cytochrome c oxidase assembly factor 3                                                |
| C3orf14  | 2.34  | 0.0275 | Chromosome 3 open reading frame 14                                                    |
| CUX1     | 2.39  | 0.0243 | Cut-like homeobox 1                                                                   |
| WBP1L    | 2.41  | 0.0263 | Ww domain binding protein 1-like                                                      |
| SLC25A10 | 2.42  | 0.0208 | Solute carrier family 25 (mitochondrial carrier dicarboxylate transporter), member 10 |
| CTSH     | 2.44  | 0.0399 | Cathepsin h                                                                           |
| RBM8A    | 2.47  | 0.0208 | Rna binding motif protein 8a                                                          |
| JUND     | 2.49  | 0.0285 | Jun d proto-oncogene                                                                  |
| MXD4     | 2.54  | 0.0147 | Max dimerization protein 4                                                            |
| ITPK1    | 2.55  | 0.0335 | Inositol-tetrakisphosphate 1-kinase                                                   |
| DHRS11   | 2.59  | 0.0077 | Dehydrogenase/reductase (sdr family) member 11                                        |

|         |      |        |                                                             |
|---------|------|--------|-------------------------------------------------------------|
| ARL6IP1 | 2.62 | 0.0208 | Adp-ribosylation factor like gtpase 6 interacting protein 1 |
| RBPM52  | 2.67 | 0.0208 | Rna binding protein with multiple splicing 2                |
| CDKN1A  | 2.75 | 0.0208 | Cyclin-dependent kinase inhibitor 1a (p21, cip1)            |
| NDUFB1  | 2.89 | 0.0390 | Nadh dehydrogenase (ubiquinone) 1 beta subcomplex, 1, 7kda  |
| LRRC8C  | 2.92 | 0.0147 | Leucine rich repeat containing 8 family, member c           |
| BTBD2   | 2.92 | 0.0149 | Btb (poz) domain containing 2                               |
| H1FO    | 3.03 | 0.0316 | H1 histone family, member 0                                 |
| NARF    | 3.52 | 0.0255 | Nuclear prelamin a recognition factor                       |
| C1QL1   | 4.00 | 0.0400 | Complement component 1, q subcomponent-like 1               |
| KLF2    | 4.09 | 0,0353 | Kruppel-like factor 2                                       |

Supplementary Table S2:

Differentially expressed coding genes after 48 h of silencing NEAT1

| Gene     | x-fold change | FDR p value | Description                                                                                   |
|----------|---------------|-------------|-----------------------------------------------------------------------------------------------|
| ACTG2    | -24.46        | 0.0065      | Actin, gamma 2, smooth muscle, enteric                                                        |
| TAGLN    | -19.67        | 0.0083      | Transgelin                                                                                    |
| CALD1    | -11.89        | 0.0186      | Caldesmon 1                                                                                   |
| SERPINE1 | -11.82        | 0.0406      | Serpin peptidase inhibitor, clade e (nexin, plasminogen activator inhibitor type 1), member 1 |
| RGS4     | -9.22         | 0.0114      | Regulator of g-protein signaling 4                                                            |
| GLIPR1   | -7.14         | 0.0454      | Gli pathogenesis-related 1                                                                    |
| THBS1    | -6.54         | 0.0111      | Thrombospondin 1                                                                              |
| VAT1L    | -6.21         | 0.0034      | Vesicle amine transport 1-like                                                                |
| TPM1     | -5.57         | 0.0113      | Tropomyosin 1 (alpha)                                                                         |
| ADM      | -5.03         | 0.0428      | Adrenomedullin                                                                                |
| CCND1    | -4.76         | 0.0186      | Cyclin d1                                                                                     |
| GNPNAT1  | -4.49         | 0.0118      | Glucosamine-phosphate n-acetyltransferase 1                                                   |
| ENTPD7   | -4.36         | 0.0146      | Ectonucleoside triphosphate diphosphohydrolase 7                                              |
| IGFBP3   | -4.19         | 0.0321      | Insulin like growth factor binding protein 3                                                  |
| TGM2     | -4.10         | 0.0262      | Transglutaminase 2                                                                            |
| GREM1    | -4.02         | 0.013       | Gremlin 1, dan family bmp antagonist [source:hgnc symbol]                                     |
| PDE1C    | -3.92         | 0.0031      | Phosphodiesterase 1c, calmodulin-dependent 70kda                                              |
| CYR61    | -3.83         | 0.0113      | Cysteine-rich, angiogenic inducer, 61                                                         |
| CTGF     | -3.57         | 0.0034      | Connective tissue growth factor                                                               |
| ACLY     | -3.35         | 0.0215      | Atp citrate lyase                                                                             |
| TGFB2    | -3.33         | 0.0138      | Transforming growth factor beta 2                                                             |
| NT5DC3   | -3.30         | 0.0118      | 5-nucleotidase domain containing 3                                                            |
| ENC1     | -3.30         | 0.0142      | Ectodermal-neural cortex 1 (with btb domain)                                                  |
| ZNF460   | -3.23         | 0.0102      | Zinc finger protein 460                                                                       |
| MEST     | -3.14         | 0.0113      | Mesoderm specific transcript                                                                  |
| FRMD6    | -3.12         | 0.0111      | Ferm domain containing 6                                                                      |
| RHOJ     | -3.04         | 0.0083      | Ras homolog family member j                                                                   |
| ANTXR2   | -3.04         | 0.0296      | Anthrax toxin receptor 2                                                                      |
| HMGCS1   | -3.02         | 0.0376      | 3-hydroxy-3-methylglutaryl-coa synthase 1 (soluble)                                           |
| SBNO1    | -3.01         | 0.0064      | Mir8072                                                                                       |
| FLNA     | -3.01         | 0.0354      | Filamin a, alpha                                                                              |
| ADIPOR1  | -2.97         | 0.0113      | Adiponectin receptor 1                                                                        |
| DCP2     | -2.93         | 0.0239      | Decapping mrna 2                                                                              |
| SRGN     | -2.91         | 0.0198      | Serglycin                                                                                     |
| CRIM1    | -2.84         | 0.0169      | Cysteine rich transmembrane bmp regulator 1 (chordin-like)                                    |
| NECAP1   | -2.81         | 0.0055      | Necap endocytosis associated 1                                                                |

|          |       |        |                                                                                        |
|----------|-------|--------|----------------------------------------------------------------------------------------|
| MET      | -2.80 | 0.0179 | Met proto-oncogene, receptor tyrosine kinase                                           |
| SKP2     | -2.79 | 0.0034 | S-phase kinase-associated protein 2, e3 ubiquitin protein ligase                       |
| PPP2CB   | -2.74 | 0.0146 | Protein phosphatase 2, catalytic subunit, beta isozyme                                 |
| SEMA3C   | -2.74 | 0.0118 | Sema domain, immunoglobulin domain (ig), short basic domain, secreted, (semaphorin) 3c |
| CLDN11   | -2.69 | 0.0064 | Claudin 11                                                                             |
| UBASH3B  | -2.68 | 0.0468 | Ubiquitin associated and sh3 domain containing b                                       |
| HN1      | -2.67 | 0.0064 | Hematological and neurological expressed 1                                             |
| HMGCR    | -2.66 | 0.0156 | 3-hydroxy-3-methylglutaryl-coa reductase                                               |
| FDFT1    | -2.65 | 0.0113 | Farnesyl-diphosphate farnesyltransferase 1                                             |
| CDK6     | -2.64 | 0.0064 | Cyclin-dependent kinase 6                                                              |
| GOLT1B   | -2.59 | 0.0064 | Golgi transport 1b                                                                     |
| LBR      | -2.57 | 0.0064 | Lamin b receptor                                                                       |
| LIMS1    | -2.51 | 0.0419 | Lim and senescent cell antigen-like domains 1                                          |
| UHMK1    | -2.51 | 0.0031 | U2af homology motif (uhm) kinase 1                                                     |
| PAQR3    | -2.50 | 0.0064 | Progestin and adipoq receptor family member iii                                        |
| FHL2     | -2.48 | 0.0158 | Four and a half lim domains 2                                                          |
| AVEN     | -2.45 | 0.0242 | Apoptosis, caspase activation inhibitor                                                |
| MSMO1    | -2.45 | 0.0173 | Methylsterol monooxygenase 1                                                           |
| SMS      | -2.36 | 0.0064 | Spermine synthase                                                                      |
| RNF24    | -2.35 | 0.0183 | Ring finger protein 24                                                                 |
| TROVE2   | -2.35 | 0.0168 | Trove domain family, member 2                                                          |
| LPCAT2   | -2.32 | 0.0293 | Lysophosphatidylcholine acyltransferase 2                                              |
| SSR3     | -2.31 | 0.0138 | Signal sequence receptor, gamma (translocon-associated protein gamma)                  |
| RUFY2    | -2.29 | 0.0102 | Run and fyve domain containing 2                                                       |
| CAV1     | -2.23 | 0.0168 | Caveolin 1                                                                             |
| PDE4D    | -2.19 | 0.0076 | Phosphodiesterase 4d, camp-specific                                                    |
| COPZ1    | -2.19 | 0.0360 | Coatomer protein complex subunit zeta 1                                                |
| BMPR1A   | -2.18 | 0.0064 | Bone morphogenetic protein receptor type ia                                            |
| CCDC50   | -2.17 | 0.0434 | Coiled-coil domain containing 50                                                       |
| SLC38A6  | -2.16 | 0.0466 | Solute carrier family 38, member 6                                                     |
| UBE4A    | -2.15 | 0.0376 | Ubiquitination factor e4a                                                              |
| STX3     | -2.14 | 0.0064 | Syntaxin 3                                                                             |
| SPDL1    | -2.12 | 0.0321 | Spindle apparatus coiled-coil protein 1                                                |
| SQLE     | -2.11 | 0.0111 | Squalene epoxidase                                                                     |
| KIF5C    | -2.11 | 0.0495 | Kinesin family member 5c                                                               |
| ADSS     | -2.08 | 0.0064 | Adenylosuccinate synthase                                                              |
| ARHGEF28 | -2.08 | 0.0171 | Rho guanine nucleotide exchange factor 28                                              |
| HIPK1    | -2.08 | 0.0436 | Homeodomain interacting protein kinase 1                                               |
| WDR36    | -2.07 | 0.0115 | Wd repeat domain 36                                                                    |
| SLC20A2  | -2.06 | 0.0404 | Solute carrier family 20 (phosphate transporter), member 2                             |

|                     |       |        |                                                                                                |
|---------------------|-------|--------|------------------------------------------------------------------------------------------------|
| SECISBP2L           | -2.04 | 0.0405 | Secis binding protein 2-like                                                                   |
| GIN51               | -2.03 | 0.0490 | Gins complex subunit 1 (psf1 homolog)                                                          |
| GTF2E1              | -2.00 | 0.0295 | General transcription factor iie subunit 1                                                     |
| ARL5B               | -2.00 | 0.0400 | Adp-ribosylation factor like gtpase 5b                                                         |
| EPB41               | 2.03  | 0.0064 | Erythrocyte membrane protein band 4.1                                                          |
| PSME1               | 2.05  | 0.0321 | Proteasome activator subunit 1                                                                 |
| UNK                 | 2.08  | 0.0414 | Unkempt family zinc finger                                                                     |
| RAB15               | 2.08  | 0.0259 | Rab15, member ras oncogene family                                                              |
| SDC3                | 2.1.  | 0.0241 | Syndecan 3                                                                                     |
| TMEM106C            | 2.14  | 0.0434 | Transmembrane protein 106c                                                                     |
| GNA11               | 2.16  | 0.0329 | Guanine nucleotide binding protein (g protein), alpha 11 (gq class)                            |
| PRDX2               | 2.16  | 0.0376 | Peroxiredoxin 2                                                                                |
| MOV10               | 2.17  | 0.0474 | Mov10 risc complex rna helicase                                                                |
| ARL6IP1             | 2.18  | 0.0388 | Adp-ribosylation factor like gtpase 6 interacting protein 1                                    |
| CUX1                | 2.25  | 0.0113 | Cut-like homeobox 1                                                                            |
| C1orf21             | 2.26  | 0.0167 | Chromosome 1 open reading frame 21                                                             |
| MLST8               | 2.28  | 0.0064 | Mtor associated protein, lst8 homolog                                                          |
| DNPH1               | 2.33  | 0.0168 | 2-deoxynucleoside 5-phosphate n-hydrolase 1                                                    |
| C1QL4               | 2.39  | 0.0329 | Complement component 1, q subcomponent-like 4                                                  |
| KCNIP3              | 2.45  | 0.0115 | Kv channel interacting protein 3, calsenilin                                                   |
| HOMER2              | 2.46  | 0.0337 | Homer scaffolding protein 2                                                                    |
| AP2A1               | 2.51  | 0.0055 | Adaptor-related protein complex 2, alpha 1 subunit                                             |
| NUP210              | 2.58  | 0.0459 | Nucleoporin 210kda                                                                             |
| KIAA0101<br>CSNK1G1 | 2.58  | 0.0458 | Casein kinase 1, gamma 1                                                                       |
| SMC1A               | 2.65  | 0.0186 | Structural maintenance of chromosomes 1a                                                       |
| COA3                | 2.65  | 0.0156 | Cytochrome c oxidase assembly factor 3                                                         |
| GATS                | 2.68  | 0.0198 | Gats, stromal antigen 3 opposite strand                                                        |
| MDK                 | 2.68  | 0.0228 | Midkine (neurite growth-promoting factor 2)                                                    |
| NCOA7               | 2.80  | 0.0329 | Nuclear receptor coactivator 7                                                                 |
| ITPK1               | 2.83  | 0.0146 | Inositol-tetrakisphosphate 1-kinase                                                            |
| TGFBR3              | 2.89  | 0.0437 | Transforming growth factor beta receptor iii                                                   |
| BTBD2               | 3.01  | 0.0113 | Btb (poz) domain containing 2                                                                  |
| E2F1                | 3.05  | 0.0034 | E2f transcription factor 1                                                                     |
| TEAD2               | 3.07  | 0.0227 | Tea domain family member 2                                                                     |
| SAMHD1              | 3.13  | 0.0374 | Sam domain and hd domain 1                                                                     |
| H1FO                | 3.14  | 0.0179 | H1 histone family, member 0                                                                    |
| MAN2A2              | 3.19  | 0.0214 | Mannosidase, alpha, class 2a, member 2                                                         |
| PIK3R2 IFI30        | 3.24  | 0.0205 | IPhosphoinositide-3-kinase, regulatory subunit 2 (beta) interferon, gamma-inducible protein 30 |
| JUND                | 3.25  | 0.0295 | Jun d proto-oncogene                                                                           |

|             |       |        |                                                                                 |
|-------------|-------|--------|---------------------------------------------------------------------------------|
| SEMA6B      | 3.48  | 0.0146 | Sema domain, transmembrane domain (tm), and cytoplasmic domain, (semaphorin) 6b |
| GP1BB SEPT5 | 3.81  | 0.0376 | Glycoprotein Ib (platelet), beta polypeptide septin 5                           |
| GNG4        | 3.88  | 0.0341 | Guanine nucleotide binding protein (g protein), gamma 4                         |
| LRRC8C      | 3.92  | 0.0064 | Leucine rich repeat containing 8 family, member c                               |
| CDKN1A      | 4.21  | 0.0121 | Cyclin-dependent kinase inhibitor 1a (p21, cip1)                                |
| PLSCR1      | 4.40  | 0.0468 | Phospholipid scramblase 1                                                       |
| CPNE2       | 4.56  | 0.0415 | Copine ii                                                                       |
| WBP1L       | 4.62  | 0.0034 | Ww domain binding protein 1-like                                                |
| OAS3        | 7.21  | 0.0064 | 2-5-oligoadenylate synthetase 3                                                 |
| C1QL1       | 10.20 | 0.0169 | Complement component 1, q subcomponent-like 1                                   |
| MX1         | 21.65 | 0.0474 | Mx dynamin-like gtpase 1                                                        |

Supplementary Table S3:

Significantly enriched GAD diseases based on all DECGs

| Term                                     | P value               | Count | Genes                                                                                                                                                                                                                                 |
|------------------------------------------|-----------------------|-------|---------------------------------------------------------------------------------------------------------------------------------------------------------------------------------------------------------------------------------------|
| Ovarian cancer                           | 3.25*10 <sup>-9</sup> | 17    | DUSP5, CDKN1A, TGFB2, IGFBP3, MX1, SERPINE1, INHBA, CYR61, CTGF, H1FO, CDK6, CCND1, OAS3, E2F1, TIMP3, SKP2, MEST                                                                                                                     |
| Plasma HDL cholesterol (HDL-C) levels    | 0.002                 | 9     | SQLE, ACLY, EDN1, HMGCS1, PIK3R2, MSMO1, HMGCR, ADIPOR1, FDFT1                                                                                                                                                                        |
| Type 2 Diabetes  edema                   | 0.003                 | 34    | AVEN, CDKN1A, TAGLN, SERPINE1, ADM, HMGCR, ADIPOR1, THBS1, RGS4, GLIPR1, FLNA, TIMP3, CTSH, SKP2, LBR, TEAD2, FDFT1, DUSP5, TGFB2, MYOCD, EDN1, PDE4D, CAV1, IGFBP3, TPM1, TGFB3, SQLE, ACTC1, CDK6, NAV3, DDAH1, RAB15, LPCAT2, SGK1 |
| Lung cancer                              | 0.003                 | 13    | CDKN1A, EDN1, CAV1, IGFBP3, MX1, SERPINE1, HMGCR, CTGF, CCND1, RAB15, CTSH, MEST, MET                                                                                                                                                 |
| Bone mineral density                     | 0.005                 | 11    | TGFB3, GREM1, CDKN1A, TGFB2, CDK6, CCND1, IGFBP3, E2F1, ADIPOR1, BMPR1A, CTGF                                                                                                                                                         |
| Atherosclerosis                          | 0.006                 | 10    | EDN1, TGFB2, PDE4D, CAV1, IGFBP3, SERPINE1, PDGFA, HMGCR, ADIPOR1, THBS1                                                                                                                                                              |
| Colorectal cancer                        | 0.006                 | 11    | GREM1, CDKN1A, CCND1, MDK, CAV1, IGFBP3, SERPINE1, HMGCR, INHBA, ADIPOR1, THBS1                                                                                                                                                       |
| Cholesterol, HDL                         | 0.007                 | 11    | SBNO1, PDE4D, OAS3, TPM1, ITPK1, ARID5B, ADM, NCOA7, HMGCR, SGK1, CTGF                                                                                                                                                                |
| Bladder cancer                           | 0.010                 | 12    | CDKN1A, EDN1, CDK6, CCND1, RAB15, CAV1, IGFBP3, MX1, CTSH, HMGCR, MEST, MET                                                                                                                                                           |
| Glaucoma, open-angle                     | 0.011                 | 4     | CDKN1A, WDR36, CAV1, SERPINE1                                                                                                                                                                                                         |
| Hepatopulmonary syndrome liver cirrhosis | 0.012                 | 5     | EDN1, CAV1, SERPINE1, THBS1, BMPR1A                                                                                                                                                                                                   |
| Mouth neoplasms precancerous conditions  | 0.012                 | 3     | CDKN1A, CDK6, CCND1                                                                                                                                                                                                                   |
| Chronic obstructive pulmonary disease    | 0.015                 | 10    | EDN1, CCND1, RAB15, CAV1, IGFBP3, MX1, CTSH, HMGCR, MEST, MET                                                                                                                                                                         |
| Sleep                                    | 0.018                 | 4     | EPB41, PDE4D, ITPK1, NCOA7                                                                                                                                                                                                            |
| Type 2 diabetes                          | 0.019                 | 9     | GREM1, EDN1, DDAH1, IGFBP3, SERPINE1, HMGCR, ADIPOR1, KLF2, TGM2                                                                                                                                                                      |
| Amyotrophic lateral sclerosis anoxia     | 0.023                 | 3     | CAV1, SERPINE1, INHBA                                                                                                                                                                                                                 |
| Glaucoma                                 | 0.024                 | 3     | CDKN1A, EDN1, WDR36                                                                                                                                                                                                                   |



|                                              |       |    |                                                                                 |
|----------------------------------------------|-------|----|---------------------------------------------------------------------------------|
| Hepatitis c, chronic liver cirrhosis         | 0.026 | 4  | TGFBR3, TGFB2, MX1, TIMP3                                                       |
| Heart failure                                | 0.028 | 9  | ADAM19, TGFBR3, EDN1, FRMD6, ATXN1, ARHGEF28, NCOA7, INHBA, SGK1                |
| Bone density osteoporosis                    | 0.028 | 2  | TGFB2, SERPINE1                                                                 |
| Obesity                                      | 0.030 | 7  | TGFBR3, TGFB2, IGFBP3, SERPINE1, TACC1, INHBA, BMPR1A                           |
| Stroke                                       | 0.030 | 11 | ATXN1, CUX1, YTHDF3, UBASH3B, TRPC4, PDE4D, SERPINE1, HMGCR, ADSS, VAT1L, C1QL1 |
| Kidney dysfunction                           | 0.037 | 2  | EDN1, SERPINE1                                                                  |
| Dupuytren's disease                          | 0.037 | 2  | TGFBR3, TGFB2                                                                   |
| Squamous cell carcinoma of the head and neck | 0.037 | 2  | CDKN1A, CCND1                                                                   |
| Retinopathy, diabetic                        | 0.038 | 3  | EDN1, SERPINE1, TIMP3                                                           |
| Oral cancer                                  | 0.049 | 3  | CDKN1A, CCND1, SERPINE1                                                         |

Enrichment analysis based on all coding genes expressed by hMCs (mean channel intensity > 100, according to Clariom™ S Assay); GAD: Genetic Association Database; EASE (expression analysis systematic explorer ) score < 0.05; p < 0.05

Supplementary Table S4:

Significantly enriched GO BP (direct) based on all DECGs

| Term                                                    | P value                | Count | Genes                                                                                          |
|---------------------------------------------------------|------------------------|-------|------------------------------------------------------------------------------------------------|
| Negative regulation of apoptotic process                | $2.57 \times 10^{-12}$ | 14    | AVEN, CDKN1A, ARL6IP1, AMIGO2, FHL2, THBS1, CYR61, GREM1, PRDX2, ACTC1, CTSH, FLNA, IER3, TGM2 |
| Positive regulation of smooth muscle cell proliferation | $2.08 \times 10^{-12}$ | 6     | EDN1, RBPMS2, HMGCR, SKP2, THBS1, TGM2                                                         |
| Positive regulation of gene expression                  | $1.39 \times 10^{-12}$ | 11    | TGFB2, PLSCR1, ACTC1, CDK6, CAV1, E2F1, CTSH, INHBA, ACTG2, CTGF, LIMS1                        |
| Positive regulation of angiogenesis                     | $6.23 \times 10^{-11}$ | 7     | GREM1, DDAH1, SERPINE1, CTSH, ADM, HIPK1, THBS1                                                |
| Platelet degranulation                                  | $4.16 \times 10^{-10}$ | 8     | SRGN, TGFB2, SERPINE1, PDGFA, TIMP3, FLNA, FAM3C, THBS1                                        |
| Cholesterol biosynthetic process                        | $1.08 \times 10^{-10}$ | 7     | SQLE, ACLY, HMGCS1, MSMO1, HMGCR, LBR, FDFT1                                                   |
| Cell cycle arrest                                       | 0.002                  | 7     | CDKN1A, TGFB2, CDK6, MLST8, INHBA, THBS1, UHMK1                                                |
| Response to drug                                        | 0.002                  | 10    | CDKN1A, TGFB2, ACTC1, JUND, SEMA3C, CCND1, HMGCS1, MDK, INHBA, THBS1                           |
| Response to wounding                                    | 0.003                  | 5     | TGFB2, MDK, PDGFA, ADM, CTGF                                                                   |
| Semaphorin-plexin signaling pathway                     | 0.003                  | 4     | SEMA6B, SEMA3C, FLNA, MET                                                                      |
| Sterol biosynthetic process                             | 0.003                  | 3     | SQLE, MSMO1, LBR                                                                               |
| Negative regulation of cell growth                      | 0.005                  | 6     | GREM1, CDKN1A, TGFB2, GNG4, INHBA, ADIPOR1                                                     |
| Palate development                                      | 0.005                  | 5     | TGFBR3, TGFB2, ARID5B, INHBA, BMPR1A                                                           |
| Cardiac right ventricle morphogenesis                   | 0.006                  | 3     | TGFB2, SEMA3C, BMPR1A                                                                          |
| Regulation of cell growth                               | 0.006                  | 5     | IGFBP3, CRIM1, SGK1, CYR61, CTGF                                                               |
| Positive regulation of cell migration                   | 0.007                  | 7     | SEMA6B, EDN1, SEMA3C, PDGFA, CTSH, THBS1, CYR61                                                |
| Isoprenoid biosynthetic process                         | 0.007                  | 3     | HMGCS1, HMGCR, FDFT1                                                                           |
| Negative regulation of smooth muscle cell migration     | 0.007                  | 3     | IGFBP3, SERPINE1, BMPR1A                                                                       |
| Cell-cell signaling                                     | 0.008                  | 8     | GREM1, EDN1, TGFB2, PDGFA, ADM, INHBA, CYR61, CTGF                                             |
| Regulation of G1/S transition of mitotic cell cycle     | 0.009                  | 3     | CCND1, PSME1, E2F1                                                                             |
| Positive regulation of cell proliferation               | 0.010                  | 11    | GREM1, MYOCD, EDN1, TGFB2, PDGFA, CTSH, ADM, STX3, HIPK1, THBS1, CTGF                          |

|                                                                                                                            |       |    |                                                                                                                  |
|----------------------------------------------------------------------------------------------------------------------------|-------|----|------------------------------------------------------------------------------------------------------------------|
| Positive regulation of fibroblast proliferation                                                                            | 0.013 | 4  | CDKN1A, CDK6, E2F1, PDGFA                                                                                        |
| G1/S transition of mitotic cell cycle                                                                                      | 0.014 | 5  | CDKN1A, CDK6, CCND1, INHBA, SKP2                                                                                 |
| Vasculogenesis                                                                                                             | 0.014 | 4  | MYOCD, CAV1, ADM, TEAD2                                                                                          |
| Regulation of glucose metabolic process                                                                                    | 0.017 | 3  | IGFBP3, ADIPOR1, PDK2                                                                                            |
| Negative regulation of peptidyl-serine phosphorylation                                                                     | 0.018 | 3  | PDE4D, CAV1, PAQR3                                                                                               |
| Positive regulation of transforming growth factor beta receptor signaling pathway                                          | 0.020 | 3  | TGFBR3, MYOCD, THBS1                                                                                             |
| Cell migration                                                                                                             | 0.020 | 6  | TGFBR3, TGFB2, MDK, SDC3, THBS1, CTGF                                                                            |
| Response to hypoxia                                                                                                        | 0.020 | 6  | TGFBR3, MYOCD, TGFB2, CAV1, ADM, THBS1                                                                           |
| Inactivation of MAPK activity                                                                                              | 0.021 | 3  | RGS4, DUSP5, CAV1                                                                                                |
| Actomyosin structure organization                                                                                          | 0.025 | 3  | FRMD6, ACTC1, EPB41                                                                                              |
| Liver development                                                                                                          | 0.030 | 4  | TGFBR3, HMGCS1, GNPAT1, ARID5B                                                                                   |
| Positive regulation of transcription from RNA polymerase II promoter                                                       | 0.033 | 16 | MYOCD, EDN1, JUND, SERPINE1, PIK3R2, INHBA, CBFA2T2, CYR61, KLF2, GREM1, PLSCR1, E2F1, NCOA7, MET, TEAD2, BMPR1A |
| Apoptotic process                                                                                                          | 0.034 | 11 | GREM1, AVEN, PLSCR1, ACTC1, ARL6IP1, KCNIP3, IGFBP3, MX1, CTSN, SGK1, IER3                                       |
| Blood vessel remodeling                                                                                                    | 0.034 | 3  | TGFB2, SEMA3C, TGM2                                                                                              |
| Lateral mesoderm development                                                                                               | 0.036 | 2  | TEAD2, BMPR1A                                                                                                    |
| Regulation of DNA biosynthetic process                                                                                     | 0.036 | 2  | CDKN1A, PDGFA                                                                                                    |
| Positive regulation of transcription from RNA polymerase II promoter involved in myocardial precursor cell differentiation | 0.036 | 2  | GREM1, MYOCD                                                                                                     |
| Lung alveolus development                                                                                                  | 0.038 | 3  | ERRFI1, MYOCD, PDGFA                                                                                             |
| Epithelial to mesenchymal transition                                                                                       | 0.038 | 3  | TGFBR3, TGFB2, LIMS1                                                                                             |
| Negative chemotaxis                                                                                                        | 0.038 | 3  | SEMA6B, SEMA3C, PDGFA                                                                                            |
| Positive regulation of cell differentiation                                                                                | 0.044 | 3  | JUND, CYR61, CTGF                                                                                                |
| Response to purine-containing compound                                                                                     | 0.044 | 2  | HMGCS1, ADSS                                                                                                     |
| Mesenchyme migration                                                                                                       | 0.044 | 2  | ACTC1, ACTG2                                                                                                     |

|                                                                    |       |   |                     |
|--------------------------------------------------------------------|-------|---|---------------------|
| Negative regulation of plasminogen activation                      | 0.044 | 2 | SERPINE1, THBS1     |
| Hair follicle development                                          | 0.046 | 3 | TGFB2, PDGFA, INHBA |
| Camp-mediated signaling                                            | 0.046 | 3 | PDE4D, ADM, TGM2    |
| Regulation of G-protein coupled receptor protein signaling pathway | 0.048 | 3 | RGS4, GNG4, HOMER2  |
| Response to progesterone                                           | 0.048 | 3 | TGFB2, CAV1, THBS1  |

Enrichment analysis based on all coding genes expressed by hMCs (mean channel intensity > 100, according to Clariom™ S Assay); GO BP: Gene Ontology Biological Processes; EASE (expression analysis systematic explorer ) score < 0.05; p < 0.05

Supplementary Table S5:

Significantly enriched GO CC (direct) based on all DECGs

| Term                                               | P value                | Count | Genes                                                                                                                                                                                                                                                                                                                             |
|----------------------------------------------------|------------------------|-------|-----------------------------------------------------------------------------------------------------------------------------------------------------------------------------------------------------------------------------------------------------------------------------------------------------------------------------------|
| Cytosol                                            | 9.21*10 <sup>-11</sup> | 47    | ERRFI1, CDKN1A, PDE1C, RBM8A, ARL6IP1, ARHGEF28, AP2A1, PIK3R2, ACTG2, CTGF, RGS4, PPP2CB, PRDX2, CCND1, CUX1, CALD1, NT5DC3, MLST8, GNPAT1, FLNA, CTSH, SPDL1, SKP2, ADSS, TGM2, IER3, HMGCS1, PDE4D, KCNIP3, TPM1, MX1, ITPK1, SMC1A, COPZ1, ACLY, MOV10, PLSCR1, ACTC1, CDK6, DDAH1, OAS3, RHOJ, SMS, PSME1, SGK1, DCP2, LIMS1 |
| Platelet alpha granule lumen                       | 0.001                  | 5     | SRGN, TGFB2, SERPINE1, PDGFA, THBS1                                                                                                                                                                                                                                                                                               |
| Cyclin-dependent protein kinase holoenzyme complex | 0.008                  | 3     | CDKN1A, CDK6, CCND1                                                                                                                                                                                                                                                                                                               |
| Endoplasmic reticulum membrane                     | 0.010                  | 16    | ARL6IP1, NUP210, CAV1, MX1, SSR3, MSMO1, HMGCR, ANTXR2, COPZ1, SQLE, LPCAT2, LRRC8C, TMEM106C, SGK1, MEST, FDFT1                                                                                                                                                                                                                  |
| Cortical cytoskeleton                              | 0.016                  | 3     | EPB41, TRPC4, FLNA                                                                                                                                                                                                                                                                                                                |
| Golgi membrane                                     | 0.017                  | 12    | SRGN, GOLT1B, CUX1, RNF24, MAN2A2, CAV1, LPCAT2, PAQR3, PDGFA, GNPAT1, COPZ1, ST6GALNAC5                                                                                                                                                                                                                                          |
| Extracellular matrix                               | 0.017                  | 8     | TGFB2, PLSCR1, SERPINE1, TIMP3, FLNA, THBS1, CYR61, TGM2                                                                                                                                                                                                                                                                          |
| Extracellular exosome                              | 0.022                  | 36    | SEMA3C, SLC20A2, GSTCD, SERPINE1, NDUFB1, THBS1, DNPH1, ACTG2, PPP2CB, PRDX2, GNG4, GNA11, FLNA, TIMP3, CTSH, SH3BGRL2, CPNE2, FAM3C, STX3, TSPAN3, MEST, ADSS, TGM2, IGFBP3, CRIM1, TGFB3, CLDN11, ACLY, PLSCR1, TMEM2, ACTC1, DDAH1, RAB15, RHOJ, SMS, PSME1                                                                    |

Enrichment analysis based on all coding genes expressed by hMCs (mean channel intensity > 100, according to Clariom™ S Assay); GO CC: Gene Ontology Cellular Compartment; EASE (expression analysis systematic explorer ) score < 0.05; p < 0.05

Supplementary Table S6:

Significantly enriched GO MF (direct) based on all DECGs

| Term                                               | P value                | Count | Genes                                                                                                                                                                                                                                                                                                                                                                                                                                                                                                                                                                                                                                                                                                                                                              |
|----------------------------------------------------|------------------------|-------|--------------------------------------------------------------------------------------------------------------------------------------------------------------------------------------------------------------------------------------------------------------------------------------------------------------------------------------------------------------------------------------------------------------------------------------------------------------------------------------------------------------------------------------------------------------------------------------------------------------------------------------------------------------------------------------------------------------------------------------------------------------------|
| Insulin-like growth factor binding                 | $5.60 \times 10^{-11}$ | 4     | IGFBP3, CRIM1, CYR61, CTGF                                                                                                                                                                                                                                                                                                                                                                                                                                                                                                                                                                                                                                                                                                                                         |
| Protein binding                                    | $9.63 \times 10^{-9}$  | 105   | ERRFI1, ARL6IP1, SERPINE1, WBP1L, ANTXR2, CTGF, CCND1, UBASH3B, KIF5C, CPNE2, FAM3C, SKP2, TGM2, IER3, IGFBP3, TPM1, UBE4A, ARID5B, UHMK1, ACLY, FRMD6, PSME1, RBM8A, EPB41, GSTCD, PDGFA, PIK3R2, GTF2E1, ATXN1, CALD1, BTBD2, COA3, TGFB2, JUND, HOMER2, CAV1, INHBA, MOV10, H1FO, CDK6, MXD4, BMPR1A, AVEN, CDKN1A, FHL2, ADM, AP2A1, DNPH1, ENC1, PBK, RBPMS2, MLST8, TIMP3, CTSH, SPDL1, LBR, TEAD2, CCDC50, SRGN, DUSP5, EDN1, MYOCD, TRPC4, GP1BB, SECISBP2L, PDE4D, SMC1A, CBFA2T2, C1QL1, TGFB3, GREM1, PLSCR1, OAS3, RHOJ, TMEM106C, SLC25A10, NCOA7, SGK1, MET, DCP2, TAGLN, AMIGO2, HMGCR, SAMHD1, THBS1, PPP2CB, GNG4, LRRC8C, E2F1, FLNA, STX3, ADSS, VAT1L, ZNF460, RNF24, YTHDF3, KCNIP3, MX1, C1ORF21, HIPK1, KLF2, KIAA0101, RAB15, TACC1, LIMS1 |
| 3',5'-cyclic-nucleotide phosphodiesterase activity | 0.019                  | 3     | PDE1C, PDE4D, UBE4A                                                                                                                                                                                                                                                                                                                                                                                                                                                                                                                                                                                                                                                                                                                                                |
| Identical protein binding                          | 0.021                  | 14    | ARL6IP1, GP1BB, CAV1, FHL2, INHBA, C1QL4, ADIPOR1, THBS1, DNPH1, CLDN11, ATXN1, UBASH3B, GNPAT1, SKP2                                                                                                                                                                                                                                                                                                                                                                                                                                                                                                                                                                                                                                                              |
| Fibronectin binding                                | 0.024                  | 3     | IGFBP3, THBS1, CTGF                                                                                                                                                                                                                                                                                                                                                                                                                                                                                                                                                                                                                                                                                                                                                |

Enrichment analysis based on all coding genes expressed by hMCs (mean channel intensity > 100, according to Clariom™ S Assay); GO MF: Gene Ontology Molecular Function; EASE (expression analysis systematic explorer ) score < 0.05; p < 0.05

Supplementary Table S7:

Significantly enriched KEGG pathways based on all DECGs

| Term                                      | P value                | Count | Genes                                                                     |
|-------------------------------------------|------------------------|-------|---------------------------------------------------------------------------|
| Melanoma                                  | $1.04 \times 10^{-12}$ | 7     | CDKN1A, CDK6, CCND1, E2F1, PDGFA, PIK3R2, MET                             |
| p53 signaling pathway                     | $7.22 \times 10^{-11}$ | 6     | CDKN1A, CDK6, CCND1, IGFBP3, SERPINE1, THBS1                              |
| Glioma                                    | $6.28 \times 10^{-11}$ | 6     | CDKN1A, CDK6, CCND1, E2F1, PDGFA, PIK3R2                                  |
| FoxO signaling pathway                    | $5.53 \times 10^{-11}$ | 8     | CDKN1A, TGFB2, CCND1, HOMER2, PIK3R2, SKP2, SGK1, KLF2                    |
| Chronic myeloid leukemia                  | 0.001                  | 6     | CDKN1A, TGFB2, CDK6, CCND1, E2F1, PIK3R2                                  |
| Hippo signaling pathway                   | 0.001                  | 8     | PPP2CB, TGFB2, FRMD6, CCND1, SERPINE1, TEAD2, BMPR1A, CTGF                |
| Proteoglycans in cancer                   | 0.001                  | 9     | CDKN1A, TGFB2, CCND1, CAV1, TIMP3, FLNA, PIK3R2, THBS1, MET               |
| Cell cycle                                | 0.002                  | 7     | CDKN1A, TGFB2, CDK6, CCND1, E2F1, SMC1A, SKP2                             |
| MicroRNAs in cancer                       | 0.003                  | 10    | CDKN1A, TGFB2, CDK6, CCND1, TPM1, E2F1, PDGFA, TIMP3, THBS1, MET          |
| PI3K-Akt signaling pathway                | 0.004                  | 11    | PPP2CB, CDKN1A, CDK6, CCND1, GNG4, MLST8, PDGFA, PIK3R2, SGK1, THBS1, MET |
| Pancreatic cancer                         | 0.005                  | 5     | TGFB2, CDK6, CCND1, E2F1, PIK3R2                                          |
| Pathways in cancer                        | 0.009                  | 11    | CDKN1A, TGFB2, CDK6, CCND1, GNG4, GNA11, E2F1, PDGFA, PIK3R2, SKP2, MET   |
| Bladder cancer                            | 0.010                  | 4     | CDKN1A, CCND1, E2F1, THBS1                                                |
| TGF-beta signaling pathway                | 0.012                  | 5     | PPP2CB, TGFB2, INHBA, THBS1, BMPR1A                                       |
| Small cell lung cancer                    | 0.013                  | 5     | CDK6, CCND1, E2F1, PIK3R2, SKP2                                           |
| Prostate cancer                           | 0.015                  | 5     | CDKN1A, CCND1, E2F1, PDGFA, PIK3R2                                        |
| Steroid biosynthesis                      | 0.019                  | 3     | SQLE, MSMO1, FDFT1                                                        |
| Hepatitis B                               | 0.020                  | 6     | CDKN1A, TGFB2, CDK6, CCND1, E2F1, PIK3R2                                  |
| Non-small cell lung cancer                | 0.022                  | 4     | CDK6, CCND1, E2F1, PIK3R2                                                 |
| Focal adhesion                            | 0.023                  | 7     | CCND1, CAV1, PDGFA, FLNA, PIK3R2, THBS1, MET                              |
| Chagas disease (American trypanosomiasis) | 0.025                  | 5     | PPP2CB, TGFB2, GNA11, SERPINE1, PIK3R2                                    |
| AMPK signaling pathway                    | 0.043                  | 5     | PPP2CB, CCND1, PIK3R2, HMGCR, ADIPOR1                                     |

Enrichment analysis based on all coding genes expressed by hMCs (mean channel intensity > 100, according to Clariom™ S Assay); KEGG: Kyoto Encyclopedia of Genes and Genomes; EASE (expression analysis systematic explorer ) score < 0.05; p < 0.05

Supplementary Table S8:

Differentially expressed miRNAs after 24 h of silencing NEAT1

| Gene            | x-fold<br>change | P value |
|-----------------|------------------|---------|
| hsa-miR-183-5p  | 2.46             | 0.0045  |
| hsa-miR-339-5p  | 2.24             | 0.0009  |
| hsa-miR-543     | 2.14             | 0.0021  |
| hsa-miR-210-3p  | 1.95             | 0.0019  |
| hsa-miR-199a-5p | 1.93             | 0.0415  |
| hsa-miR-370-3p  | 1.74             | 0.0115  |
| hsa-miR-299-5p  | 1.71             | 0.0008  |
| hsa-miR-615-3p  | 1.71             | 0.0160  |
| hsa-miR-3180-3p | 1.70             | 0.0304  |
| hsa-miR-30c-5p  | 1.65             | 0.0133  |
| hsa-miR-19b-3p  | 1.60             | 0.0338  |
| hsa-miR-1307-3p | 1.57             | 0.0139  |
| hsa-miR-195-5p  | 1.57             | 0.0204  |
| hsa-miR-6776-5p | -1.66            | 0.0118  |
| hsa-mir-550a-1  | -1.74            | 0.0147  |
| hsa-mir-550a-2  | -1.74            | 0.0147  |
| hsa-mir-550a-3  | -1.74            | 0.0147  |
| hsa-miR-1247-3p | -1.99            | 0.0042  |
| hsa-miR-92b-5p  | -2.51            | 0.0001  |



Supplementary Table S9:

Differentially expressed miRNAs after 48 h of silencing NEAT1

| Gene            | x-fold change | P value |
|-----------------|---------------|---------|
| hsa-miR-652-3p  | 2.25          | 0.0271  |
| hsa-miR-885-3p  | 2.18          | 0.0162  |
| hsa-miR-126-3p  | 2.05          | 0.0235  |
| hsa-miR-6848-5p | 1.93          | 0.0224  |
| hsa-miR-3180-3p | 1.82          | 0.0090  |
| hsa-miR-4728-5p | 1.64          | 0.0296  |
| hsa-miR-1343-5p | 1.53          | 0.0362  |
| hsa-miR-6806-3p | -1.52         | 0.0254  |
| hsa-miR-92b-5p  | -1.55         | 0.0351  |
| hsa-miR-450b-5p | -1.84         | 0.0284  |
| hsa-miR-548a-3p | -1.87         | 0.0155  |
| hsa-miR-4663    | -2.11         | 0.0091  |

Supplementary Table S10:

Significantly enriched GO BP based on DEmiRNAs

| Term                                                                              | P value               | Count of miRNAs | Count of genes |
|-----------------------------------------------------------------------------------|-----------------------|-----------------|----------------|
| Organelle                                                                         | 1.22*10 <sup>-4</sup> | 18              | 67             |
| Ion binding                                                                       | 0.0002                | 17              | 44             |
| Cytosol                                                                           | 0.0003                | 15              | 28             |
| Fibroblast growth factor receptor signaling pathway                               | 0.0005                | 8               | 7              |
| Cholesterol biosynthetic process                                                  | 0.0046                | 4               | 4              |
| Cellular lipid metabolic process                                                  | 0.0046                | 4               | 5              |
| Platelet degranulation                                                            | 0.0046                | 5               | 4              |
| Cyclin-dependent protein kinase holoenzyme complex                                | 0.0046                | 8               | 3              |
| Cell cycle arrest                                                                 | 0.0075                | 11              | 6              |
| Cellular_component                                                                | 0.0075                | 19              | 92             |
| Mitotic cell cycle                                                                | 0.0088                | 9               | 7              |
| Platelet alpha granule lumen                                                      | 0.0101                | 4               | 3              |
| Response to drug                                                                  | 0.0115                | 8               | 9              |
| Response to purine-containing compound                                            | 0.0183                | 3               | 2              |
| Positive regulation of smooth muscle cell proliferation                           | 0.0203                | 4               | 4              |
| Fc-epsilon receptor signaling pathway                                             | 0.0203                | 4               | 4              |
| Neurotrophin TRK receptor signaling pathway                                       | 0.0203                | 7               | 5              |
| Epidermal growth factor receptor signaling pathway                                | 0.0203                | 7               | 5              |
| Negative regulation of phosphorylation                                            | 0.0203                | 8               | 3              |
| G1/S transition of mitotic cell cycle                                             | 0.0203                | 9               | 5              |
| Fibronectin binding                                                               | 0.0253                | 3               | 3              |
| Positive regulation of transforming growth factor beta receptor signaling pathway | 0.0253                | 5               | 3              |
| Cotranslational protein targeting to membrane                                     | 0.0286                | 2               | 2              |
| Sec61 translocon complex                                                          | 0.0322                | 2               | 2              |
| Phosphatidylinositol-mediated signaling                                           | 0.0322                | 4               | 4              |
| Type II transforming growth factor beta receptor binding                          | 0.0363                | 3               | 2              |
| Regulation of cell growth                                                         | 0.0363                | 3               | 4              |
| Negative regulation of epithelial cell proliferation                              | 0.0363                | 8               | 4              |
| Negative regulation of apoptotic process                                          | 0.0363                | 9               | 10             |
| Cortical cytoskeleton                                                             | 0.0370                | 4               | 3              |
| Response to organonitrogen compound                                               | 0.0430                | 5               | 3              |
| Response to organic cyclic compound                                               | 0.0430                | 6               | 5              |
| Cellular response to follicle-stimulating hormone stimulus                        | 0.0467                | 3               | 2              |
| Epithelial to mesenchymal transition                                              | 0.0482                | 4               | 3              |

Supplementary Table S11:

Significantly enriched KEGG pathways based on DEmiRNAs

| Term                       | P value | Count of miRNAs | Count of genes |
|----------------------------|---------|-----------------|----------------|
| Glioma                     | 0.0012  | 10              | 5              |
| p53 signaling pathway      | 0.0054  | 8               | 5              |
| Viral carcinogenesis       | 0.0054  | 10              | 5              |
| Melanoma                   | 0.0054  | 10              | 5              |
| Proteoglycans in cancer    | 0.0160  | 8               | 7              |
| Non-small cell lung cancer | 0.0160  | 8               | 3              |
| Pathways in cancer         | 0.0160  | 11              | 7              |
| FoxO signaling pathway     | 0.0172  | 8               | 7              |
| Pancreatic cancer          | 0.0232  | 9               | 4              |
| Cell cycle                 | 0.0232  | 10              | 6              |
| Chronic myeloid leukemia   | 0.0232  | 10              | 5              |
| Small cell lung cancer     | 0.0246  | 9               | 4              |
| TGF-beta signaling pathway | 0.0435  | 8               | 5              |
| PI3K-Akt signaling pathway | 0.0461  | 12              | 8              |

Supplementary Table S12:

Identification of NEAT1 binding miRNAs using the three databases: RNA22, mirDIP, and Starbase

| RNA22            | miRDIP           | Starbase         |
|------------------|------------------|------------------|
| hsa-miR-339-5p   | hsa-miR-339-5p   | hsa-miR-339-5p   |
| hsa-miR-615-3p   | hsa-miR-615-3p   | hsa-miR-615-3p   |
| hsa-miR-3180y-3p | hsa-miR-3180y-3p | hsa-miR-3180y-3p |
| hsa-miR-885-3p   | hsa-miR-183-5p   | hsa-miR-183-5p   |
| hsa-miR-92b-5p   | hsa-miR-195-5p   | hsa-miR-195-5p   |
| hsa-miR-1343-5p  | hsa-miR-299-5p   | hsa-miR-299-5p   |
| hsa-miR-4728-5p  | hsa-miR-652-3p   | hsa-miR-652-3p   |
| hsa-miR-6776-5p  | hsa-miR-885-3p   | hsa-miR-19b-3p   |
| hsa-miR-6848-5p  | hsa-miR-126-3p   | hsa-miR-30c-5p   |
|                  | hsa-miR-210y-3p  | hsa-miR-370y-3p  |
|                  | hsa-miR-548a-3p  | hsa-miR-450b-5p  |
|                  | hsa-miR-1307-3p  | hsa-miR-543      |

Supplementary table S12: miRNAs highlighted in yellow were identified by three databases, miRNAs highlighted in grey were identified by two databases. Non-color coded miRNAs were only identified by the respective database.

Supplementary Table S13:

Significantly enriched GAD diseases based on DECGs with potential miR-339-5p targeting site

| Term                                                      | P value               | Count | Genes                                                                                                       |
|-----------------------------------------------------------|-----------------------|-------|-------------------------------------------------------------------------------------------------------------|
| Type 2 diabetes, edema, rosiglitazone                     | $2.50 \times 10^{-5}$ | 16    | DUSP5, CDKN1A, EDN1, PDE4D, IGFBP3, SERPINE1, HMGCR, TGFB3, RGS4, CDK6, NAV3, DDAH1, RAB15, FLNA, SKP2, LBR |
| Ovarian cancer                                            | $2.50 \times 10^{-4}$ | 7     | DUSP5, CDKN1A, CDK6, OAS3, IGFBP3, SERPINE1, SKP2                                                           |
| Asthma                                                    | 0.0050                | 6     | TGFB3, EDN1, LBH, NAV3, PDE4D, SERPINE1                                                                     |
| Lung cancer                                               | 0.0080                | 6     | CDKN1A, EDN1, RAB15, IGFBP3, SERPINE1, HMGCR                                                                |
| Bladder cancer                                            | 0.0090                | 6     | CDKN1A, EDN1, CDK6, RAB15, IGFBP3, HMGCR                                                                    |
| Sleep                                                     | 0.0095                | 3     | EPB41, PDE4D, ITPK1                                                                                         |
| Kidney dysfunction                                        | 0.0098                | 2     | EDN1, SERPINE1                                                                                              |
| Atherosclerosis                                           | 0.0109                | 5     | EDN1, PDE4D, IGFBP3, SERPINE1, HMGCR                                                                        |
| Type 2 diabetes                                           | 0.0114                | 5     | EDN1, DDAH1, IGFBP3, SERPINE1, HMGCR                                                                        |
| Breast cancer                                             | 0.0147                | 6     | CDKN1A, CDK6, IGFBP3, SERPINE1, TACC1, SKP2                                                                 |
| Bone density                                              | 0.0173                | 4     | TGFB3, NAV3, PDE4D, SERPINE1                                                                                |
| Obesity, premature ovarian failure                        | 0.0233                | 4     | TGFB3, IGFBP3, SERPINE1, TACC1                                                                              |
| Brain ischemia, stroke                                    | 0.0233                | 3     | PDE4D, IGFBP3, SERPINE1                                                                                     |
| Thyroid diseases                                          | 0.0292                | 2     | PDE4D, IGFBP3                                                                                               |
| Normal variation                                          | 0.0314                | 4     | RGS4, EDN1, SERPINE1, HMGCR                                                                                 |
| Asthma                                                    | 0.0341                | 3     | EDN1, PDE4D, SERPINE1                                                                                       |
| Schizophrenia, schizoaffective disorder, bipolar disorder | 0.0364                | 2     | RGS4, ATXN1                                                                                                 |
| Myocardial infarction                                     | 0.0415                | 5     | ATXN1, NAV3, CUX1, SERPINE1, HMGCR                                                                          |
| Stroke                                                    | 0.0430                | 5     | ATXN1, CUX1, PDE4D, SERPINE1, HMGCR                                                                         |
| Mouth neoplasms, precancerous conditions                  | 0.0435                | 2     | CDKN1A, CDK6                                                                                                |
| Apoplexy, myocardial ischemia, stroke                     | 0.0435                | 2     | PDE4D, SERPINE1                                                                                             |
| Atherosclerosis, generalized                              | 0.0458                | 2     | EDN1, SERPINE1                                                                                              |
| Alzheimer's disease                                       | 0.0481                | 4     | ATXN1, SERPINE1, ENTPD7, HMGCR                                                                              |
| Overall effect                                            | 0.0482                | 2     | CDKN1A, IGFBP3                                                                                              |
| Ovarian cancer                                            | 0.0494                | 3     | CDKN1A, IGFBP3, SERPINE1                                                                                    |

Supplementary Table S14:

Significantly enriched GO BP based on DECGs with potential miR-339-5p targeting site

| <b>Term</b>                                             | <b>P value</b> | <b>Count</b> | <b>Genes</b>               |
|---------------------------------------------------------|----------------|--------------|----------------------------|
| Positive regulation of smooth muscle cell proliferation | 0.0069         | 3            | EDN1, HMGCR, SKP2          |
| Dephosphorylation                                       | 0.0138         | 3            | DUSP5, NT5DC3, ITPK1       |
| Regulation of receptor activity                         | 0.0186         | 2            | PDE4D, SERPINE1            |
| G1/S transition of mitotic cell cycle                   | 0.0191         | 3            | CDKN1A, CDK6, SKP2         |
| Platelet degranulation                                  | 0.0194         | 3            | SRGN, SERPINE1, FLNA       |
| Negative regulation of wound healing                    | 0.0226         | 2            | SERPINE1, HMGCR            |
| Negative regulation of blood coagulation                | 0.0247         | 2            | EDN1, SERPINE1             |
| Negative regulation of smooth muscle cell migration     | 0.0288         | 2            | IGFBP3, SERPINE1           |
| Regulation of pH                                        | 0.0328         | 2            | EDN1, PDK2                 |
| Regulation of glucose metabolic process                 | 0.0449         | 2            | IGFBP3, PDK2               |
| Negative regulation of cell proliferation               | 0.0489         | 4            | CDKN1A, CDK6, IGFBP3, MXD4 |

Supplementary Table S15:

Significantly enriched GO CC based on DECGs with potential miR-339-5p targeting site

| Term                                               | P value | Count | Genes                                                                                       |
|----------------------------------------------------|---------|-------|---------------------------------------------------------------------------------------------|
| Cytosol                                            | 0.0171  | 14    | CDKN1A, PDE4D, ITPK1, SMC1A, COPZ1, RGS4, CDK6, CUX1, DDAH1, OAS3, NT5DC3, FLNA, SKP2, DCP2 |
| Cyclin-dependent protein kinase holoenzyme complex | 0.0316  | 2     | CDKN1A, CDK6                                                                                |
| Cortical cytoskeleton                              | 0.0461  | 2     | EPB41, FLNA                                                                                 |

Supplementary Table S16:

Chemicals, agents, kits, as well as software and devices with their manufacturers

| Chemicals, agents, kits                                        | Manufacturers                                              |
|----------------------------------------------------------------|------------------------------------------------------------|
| Attractene Transfection Reagent                                | Qiagen, Hilden, Germany                                    |
| Accutase                                                       | Sigma Aldrich, Taufkirchen. Germany                        |
| Alexa Fluor 594 anti-wheat germ agglutinin (WGA) antibody      | Invitrogen, Carlsbad, California, USA                      |
| BrdU Cell Proliferation Assay Kit                              | Biovision GmbH, Ilmenau, Germany                           |
| Clariom™ S Assay human                                         | Thermo Fisher Scientific Inc., Waltham, Massachusetts, USA |
| Culture-Insert 2 Well in $\mu$ -Dish 35 mm                     | ibidi gmbH, Gräfelfing, Germany                            |
| Dimethyl sulfoxide (DMSO)                                      | Sigma Aldrich, Taufkirchen. Germany                        |
| DNase I                                                        | Qiagen, Hilden, Germany                                    |
| Dual-Glo® Luciferase Assay System                              | Promega, Fitchburg, Wisconsin, USA                         |
| Dulbecco's modified Eagle's medium (DMEM 21855)                | Life Technologies, Carlsbad, California, USA               |
| Fetal calf serum                                               | Sigma Aldrich, Taufkirchen. Germany                        |
| Formaldehyd (37%)                                              | Carl Roth GmbH, Karlsruhe, Germany                         |
| GeneChip™ miRNA 4.0 Array                                      | Thermo Fisher Scientific Inc., Waltham, Massachusetts, USA |
| Glucose                                                        | Merck KGaA, Darmstadt, Germany                             |
| hsa-miR-339-5p miScript miRNA mimics or negative control       | Qiagen, Hilden, Germany                                    |
| Lipofectamin RNAiMAX                                           | Thermo Fisher Scientific Inc., Waltham, Massachusetts, USA |
| Mannitol                                                       | AppliChem GmbH, Darmstadt, Germany                         |
| miCURY LNA miRNA PCR Assays                                    | Qiagen, Hilden, Germany                                    |
| miRCURY LNA RT Kit                                             | Qiagen, Hilden, Germany                                    |
| miRCURY LNA SYBR Green PCR Kit                                 | Qiagen, Hilden, Germany                                    |
| miRNeasy Mini Kit                                              | Qiagen, Hilden, Germany                                    |
| M-MLV Reverse Transkriptase                                    | Promega, Fitchburg, Wisconsin, USA                         |
| NEBuilder HiFi DNA Assembly                                    | New England Biolabs, Ipswich, Massachusetts, USA           |
| NucleoSpin RNA Plus Kit                                        | Machery-Nagel GmbH, Düren, Deutschland                     |
| Opti-MEM                                                       | Thermo Fisher Scientific Inc., Waltham, Massachusetts, USA |
| Penicillin                                                     | Life Technologies, Carlsbad, California, USA               |
| PmeI restriction endonuclease                                  | New England Biolabs, Ipswich, Massachusetts, USA           |
| Primer (for sequences, see supplementary table S21)            | Eurofins Genomics, Ebersberg Germany                       |
| pmirGLO Luciferase vector                                      | Promega, Fitchburg, Wisconsin, USA                         |
| QuantiTect SYBR Green PCR Kit                                  | Qiagen, Hilden, Germany                                    |
| Random primers                                                 | Promega, Fitchburg, Wisconsin, USA                         |
| RNasin                                                         | Promega, Fitchburg, Wisconsin, USA                         |
| Single stranded DNA oligos for luciferase reporter gene vector | Eurofins Genomics, Ebersberg Germany                       |



|                                                             |                                                            |
|-------------------------------------------------------------|------------------------------------------------------------|
| cloning (for sequences, see supplementary table 20)         |                                                            |
| siPOOLs targeting NEAT1 or scrambled control                | siTOOLS Biotech GmbH, Planegg, Germany                     |
| Streptomycin                                                | Life Technologies, Carlsbad, California, USA               |
| Thapsigargin (TG)                                           | Tocris Bioscience, Bristol, United Kingdom                 |
| TGF- $\beta$                                                | PeproTech GmbH, Hamburg, Germany                           |
| TNF $\alpha$                                                | PeproTech GmbH, Hamburg, Germany                           |
| Tunicamycin (TM)                                            | Tocris Bioscience, Bristol, United Kingdom                 |
| ViewRNA™ ISH Cell Assay Kit                                 | Thermo Fisher Scientific Inc., Waltham, Massachusetts, USA |
| Probe set for human NEAT1 (for ViewRNA™ ISH Cell Assay Kit) | Thermo Fisher Scientific Inc., Waltham, Massachusetts, USA |

Supplementary Table S17:

Software and devices

| <b>Software, devices</b>                          | <b>Manufacturers</b>                                       |
|---------------------------------------------------|------------------------------------------------------------|
| AxioStar Plus Observer Z1                         | Carl Zeiss AG, Jena, Germany                               |
| HistoQuest                                        | TissueGnostics GmbH, Vienna, Austria                       |
| SPSS Statistics Version 21                        | IBM, New York, USA                                         |
| NanoDrop 2000c spectrophotometer                  | PEQLAB Biotechnologie GmbH, Erlangen, Germany              |
| Sigmaplot                                         | Systat Software GmbH, Illinois,, USA                       |
| Tecan infinite 200 pro                            | Tecan Trading AG, Männedorf, Switzerland                   |
| Transcriptome Analysis Console (TAC) software 4.0 | Thermo Fisher Scientific Inc., Waltham, Massachusetts, USA |
| ViiA 7 Real-Time PCR System                       | Thermo Fisher Scientific Inc., Waltham, Massachusetts, USA |

Supplementary Table S18:

Data bases and online tools

| <b>Database</b>                                                               | <b>Internet address</b>                                                                                 |
|-------------------------------------------------------------------------------|---------------------------------------------------------------------------------------------------------|
| Database for Annotation, Visualization, and Integrated Discovery (DAVID) v6.8 | <a href="http://david.abcc.ncifcrf.gov/knowledgebase/">http://david.abcc.ncifcrf.gov/knowledgebase/</a> |
| DIANA miRPath v.3.0                                                           | <a href="http://www.microrna.gr/miRPathv3">http://www.microrna.gr/miRPathv3</a>                         |
| mirDIP                                                                        | <a href="http://ophid.utoronto.ca/mirDIP/">http://ophid.utoronto.ca/mirDIP/</a>                         |
| Primer3                                                                       | <a href="http://bioinfo.ut.ee/cgi-bin/primer3-0.4.0">http://bioinfo.ut.ee/cgi-bin/primer3-0.4.0</a>     |
| RNA22                                                                         | <a href="https://cm.jefferson.edu/rna22/">https://cm.jefferson.edu/rna22/</a>                           |
| Starbase                                                                      | <a href="http://starbase.sysu.edu.cn/index.php">http://starbase.sysu.edu.cn/index.php</a>               |

Supplementary Table S19

Single stranded DNA oligo sequences for cloning of luciferase reporter gene vectors

| Target site | Forward primer (5'→3')                                    |
|-------------|-----------------------------------------------------------|
| I) WT       | 5'homologSeq – CCAGGGCTTCAGGGGACAGACAGGGAT – 3'homologSeq |
| II) MUT     | 5'homologSeq – CACGCGATGACCGCACACTGTCCCAGT – 3'homologSeq |
| II) WT      | 5'homologSeq – TGTGATGCCATCTCACAGGCAGGGG – 3'homologSeq   |
| III) MUT    | 5'homologSeq – ACACTTCGCAAGACACTCCGTCCCC – 3'homologSeq   |
| III) WT     | 5'homologSeq – GGTGAGCCTGGGAGGGAGGGA – 3'homologSeq       |
| III) MUT    | 5'homologSeq – GCACTCGGAGCCTCCCTCCCT – 3'homologSeq       |
| IV) WT      | 5'homologSeq – CTTGAGCAAAGTGGGGGAGGGGGC – 3'homologSeq    |
| IV) MUT     | 5'homologSeq – CTTCTCGAAAGACCTCCTGCCACC – 3'homologSeq    |

Structure of each single stranded DNA oligo

Homologous 5' sequence - NEAT1 WT or MUT target sequence - Homologous 3' sequence

Sequence of the homologous 5' sequence (5'homologSeq): GTGTAATTCTAGTTGTTTAAACGAGCT

Sequence of the homologous 3' sequence (3'homologSeq): CGCTAGCCTCGAGTCTAGAGTCGACCT

(both 5'→3')

Supplementary Table S20

Primer sequences

| Gene      | Forward primer (5'→3') | Reverse primer (5'→3') |
|-----------|------------------------|------------------------|
| NEAT1_1/2 | TTGCTTTGCTACAAGGTGGG   | ATTTCCCCTGCCTGTGAGAT   |
| NEAT1_2   | ACAGTGGCAGGGTTCAATTC   | CTCAGATGGGGAAATGGAGA   |
| CCND1     | CCCTCGGTGTCCTACTTCAA   | AAGCGGTCCAGGTAGTTCAT   |
| CDK6      | GGATCTCTGGAGTGTGGCT    | AGGCCAGTCTTCTTCTCTG    |
| CDKN1A    | TGTCTTGTAACCTTGTGCCT   | AATCTGTCATGCTGGTCTGC   |
| CTGF      | GCCTATTCTGTCACTTCGGC   | GTACACCGTACCACCGAAGA   |
| E2F1      | CTTCGTAGCATTGCAGACCC   | AAAACATCGATCGGGCCTTG   |
| GNG4      | CCTCTCATCTGACGACTGACA  | TGAGCTTCACAGTAGGCCAG   |
| GREM1     | TCTACATCCCCAGGCACATC   | G TTCAGGGCAGTTGAGTGTG  |
| IGFBP2    | ACGAGTCTCAGAGCACAGAT   | TCCATTTCTCTACGGCAGGG   |
| PPIB      | TGTGGTGTTTGGCAAAGTTC   | GCTTCTCCACCTCGATCTTG   |
| PK2       | ACATGGCTAAGCTCCTGTGT   | CATGTGGTAGAGGTGGGAGG   |
| TGFβ2     | GACCCACATCTCTGCTAA     | TAAAGTGGACGTAGGCAGCA   |
| TGFBR3    | TGAAGTGACTGGACGAGACG   | CAGTTCACACAGTGCACCAG   |

Supplementary Figure S1

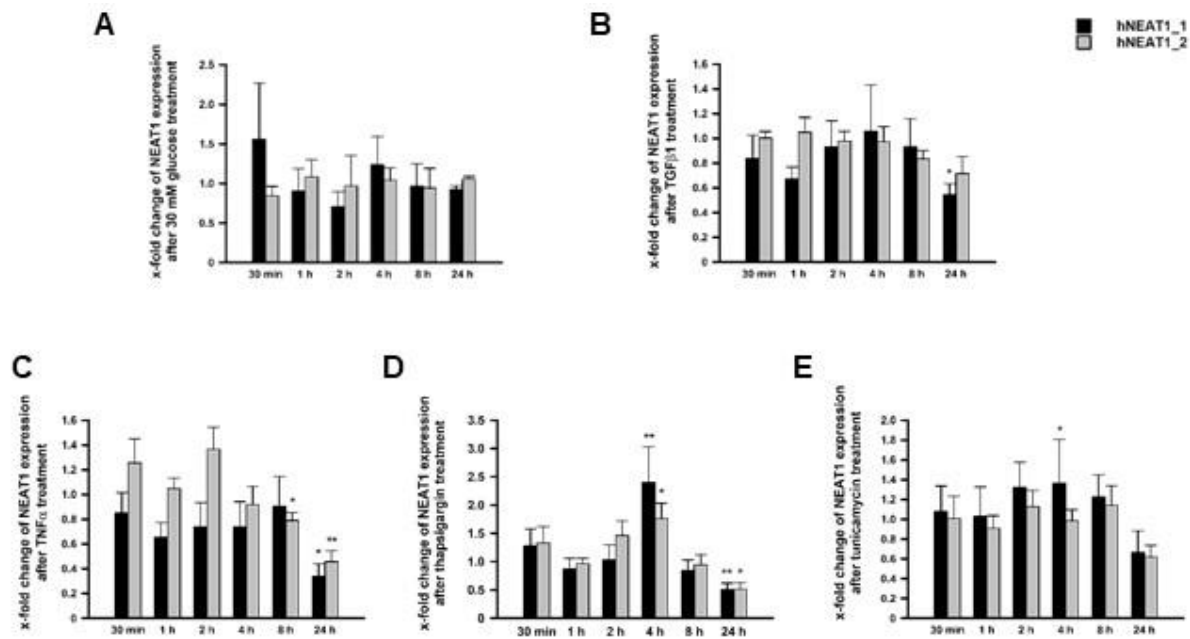

Supplementary Figure S1: NEAT1\_1 and NEAT1\_2 expression in human mesangial cell (hMCs) after stimulation. Change of NEAT1\_1 (black bars) and NEAT1\_2 (grey bars) RNA expression in hMCs after stimulation with A) 30 mM glucose normalized to mannitol, B) TGFβ1 normalized to medium, C) TNFα normalized to medium, D) thapsigargin normalized to DMSO, and E) tunicamycin normalized to DMSO. Bars represent x-fold change + SD. Overall significance of differences was analyzed by ANOVA, followed by a Student's t tests for post hoc pairwise comparisons. \*) p<0.05; \*\*) p<0.001 compared to corresponding control treatment; n= 3-4

Supplementary Figure S2

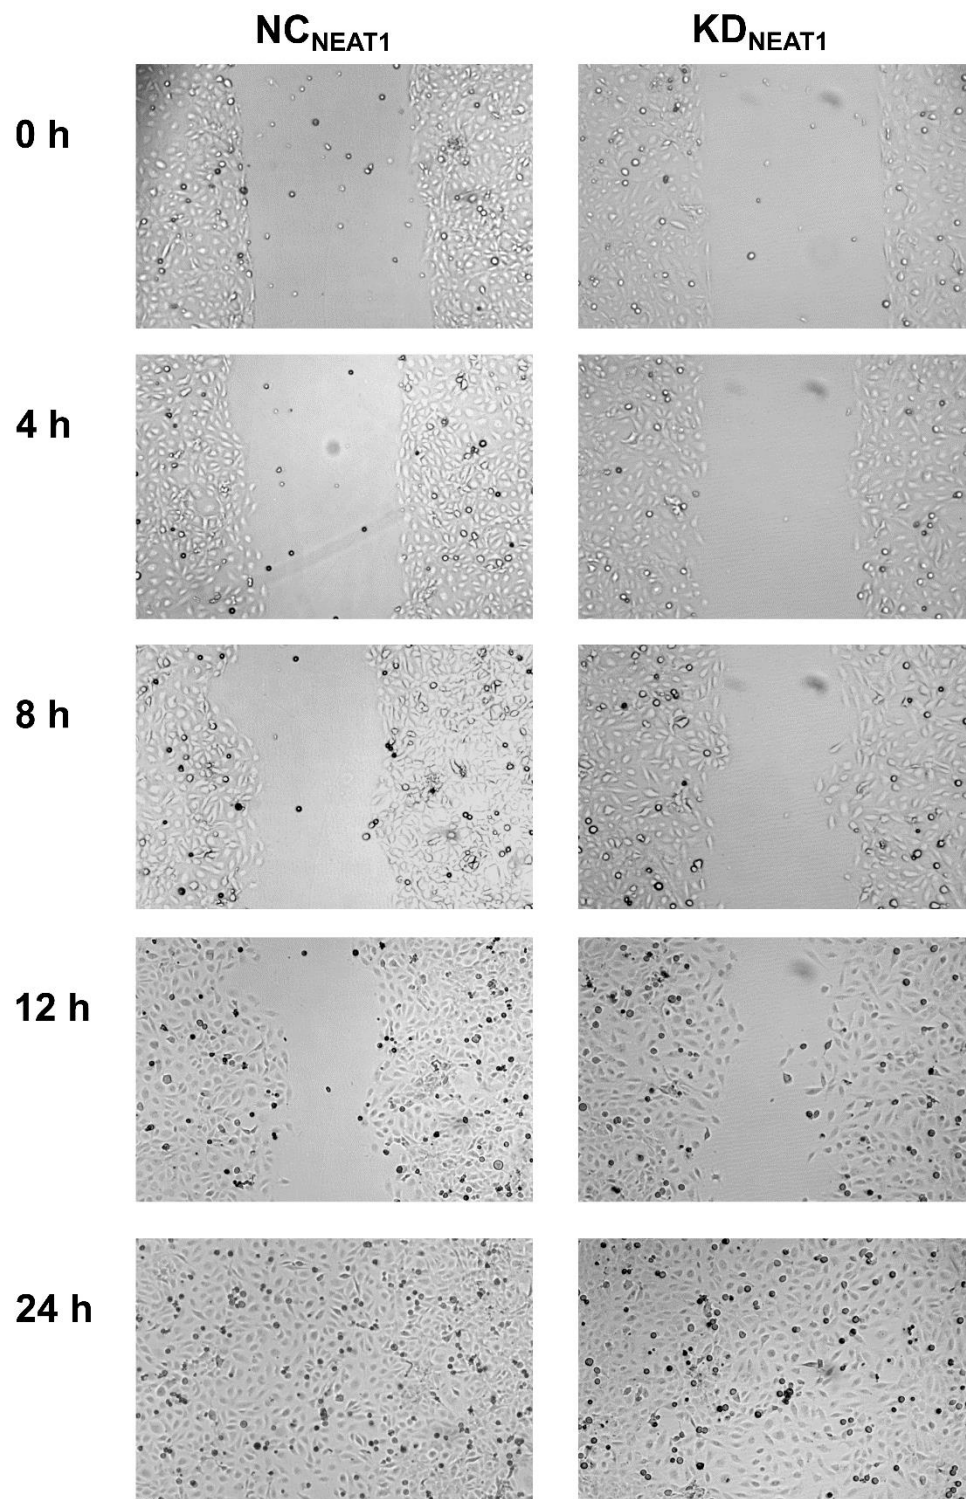

Supplementary Figure S2: Migration assay after KD<sub>NEAT1</sub> in HMCs compared to cell treated with scrambled control siPools (NC<sub>NEAT1</sub>) directly after creating the gap (0 h) as well as 4 h, 8 h, 12 h, and 24 h later.

Supplementary Figure S3

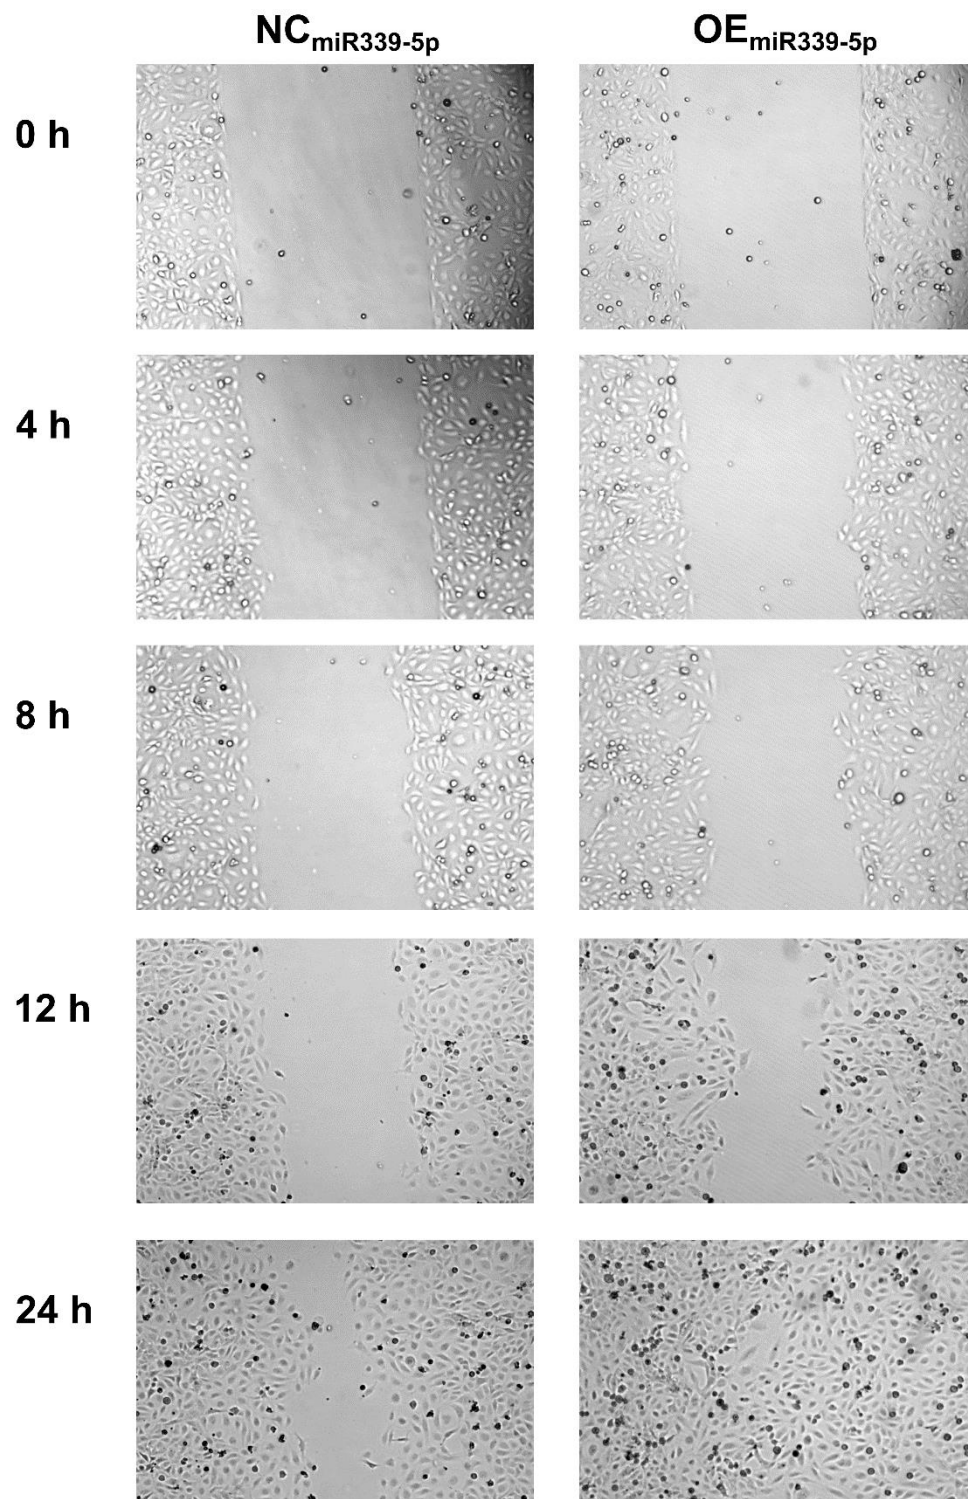

Supplementary Figure S3: Migration assay after OE<sub>miR339-5p</sub> in HMCs compared to cell treated with scrambled control mimcs (NC<sub>miR339-5p</sub>) directly after creating the gap (0 h) as well as 4 h, 8 h, 12 h, and 24 h later.
